# Supplementary material for: The Vacuolar Morphogenesis Protein Vam6-Like Protein Vlp1 Is Required for Pathogenicity of Cryptococcus neoformans
Source: MDPI journal article supplement (doi:10.3390/jof7060418), 2021-05-27
Supplement: s1 [file s1]

Supplementary Material

# The Vacuolar Morphogenesis Protein Vam6-Like Protein Vlp1 Is Required for Pathogenicity of *Cryptococcus neoformans*

Cheng-Li Fan <sup>1</sup> and Tong-Bao Liu <sup>2,3,\*</sup>

<sup>1</sup> College of Animal Science and Technology, Southwest University, Chongqing 400715, China; victoriapfan@swu.edu.cn

<sup>2</sup> State Key Laboratory of Silkworm Genome Biology, Southwest University, Chongqing 400715, China

<sup>3</sup> Medical Research Institute, Southwest University, Chongqing 400715, China

\* Correspondence: tongbaoliu@swu.edu.cn; Tel.: +86-23-6825-1088

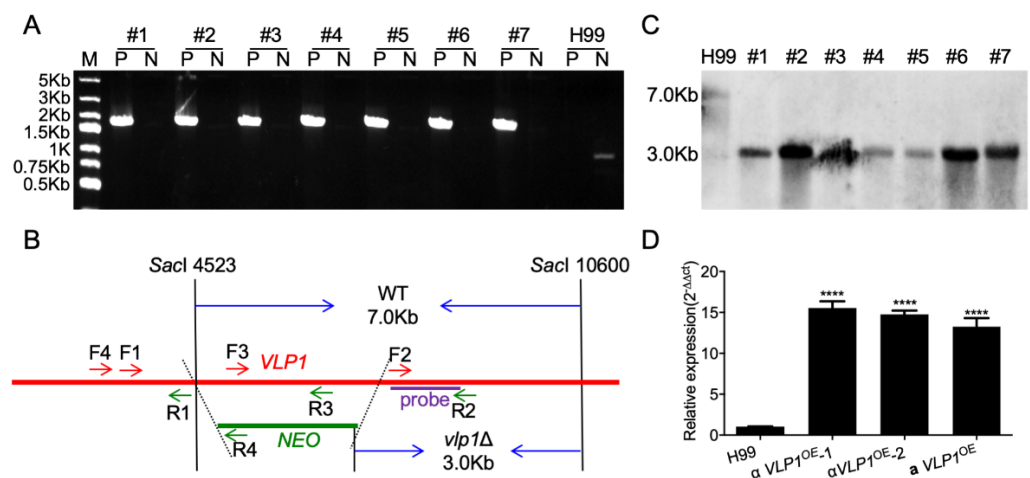

**Figure S1.** Generation of *vlp1Δ* mutants and *VLP1* overexpressed strains. (A) PCR verification of the G418 resistant transformants. #1-7: Seven G418 resistant transformants; P: positive primers (TL333/59, F4/R4 in 2B); N: negative primers (TL331/332, F3/R3 in 2B). (B) Restriction enzyme used for genomic DNA digestion and DNA probe for Southern blot. The probe was synthesized using the downstream flanking sequence of the *VLP1* gene as a template. The wild-type strain H99 produced a 7.0 Kb band, while the *vlp1Δ* mutants produced a 3.0 Kb band. (C) Southern blot analysis of *VLP1* deletion mutants. The *SacI*-digested genomic DNAs of each cryptococcal strains were fractionated and hybridized with a probe synthesized using the *VLP1* downstream flanking sequence as a template, as shown in Figure S1B. The wild-type strain H99 generate a 7.0 Kb band while the *vlp1Δ* mutants generate a 3.0 Kb band. (D) The overexpression of the *VLP1* gene was verified by relative quantitative reverse transcription PCR. The expression level of the *VLP1* gene of the wild-type strain, when grown on YPD medium, was set as 1. \*\*\*\*,  $p < 0.0001$ .

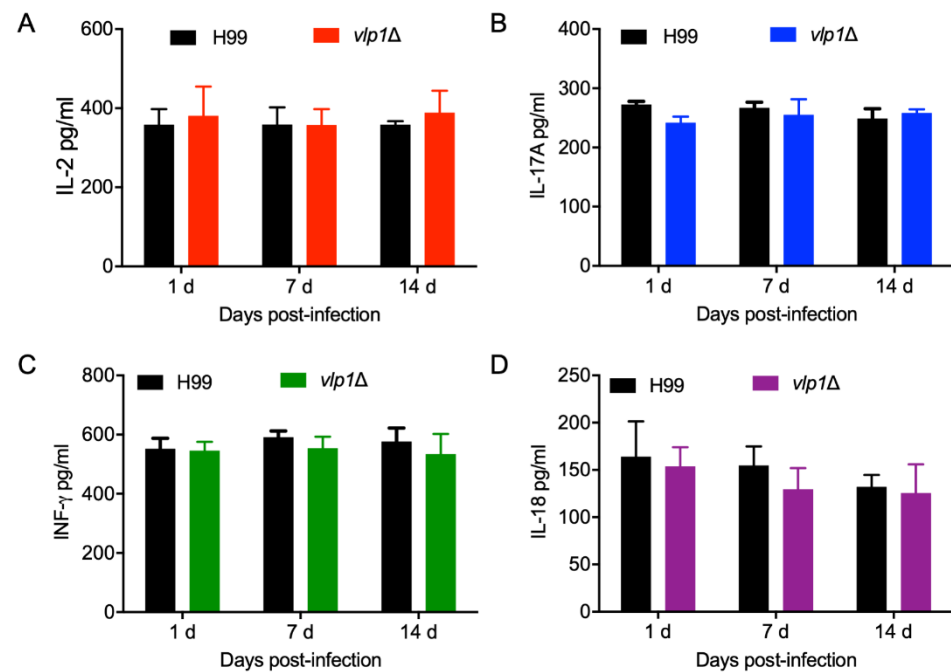

**Figure S2.** Serum cytokines analysis of the mice infected by *vlp1Δ* mutants. IL-2 (A), IL-17A (B), INF- $\gamma$  (C), and IL-18 (D) were measured by ELISA at 1, 7, 14 dpi. There was no difference in Serum cytokines production in mice infected with wild-type strains and *vlp1Δ* mutants.
